# Supplementary material for: Deciphering cell lineage specification of human lung adenocarcinoma with single-cell RNA sequencing
Source: Research Square preprint supplement (doi:10.21203/rs.3.rs-127270/v1), 2021-01-07
Supplement: Supplementary file 1 [file 23a0d13539d3995ecb9a6d34.xlsx]

## Sheet: Sheet1
Patient #	Patient ID	Sample ID	Sample type	Estimated Number of Cells	Mean Reads per Cell	Median Genes per Cell	Number of Reads	Valid Barcodes	Sequencing Saturation	Q30 Bases in Barcode	Q30 Bases in RNA Read	Q30 Bases in UMI	Reads Mapped to Genome	Reads Mapped Confidently to Genome	Reads Mapped Confidently to Intergenic Regions	Reads Mapped Confidently to Intronic Regions	Reads Mapped Confidently to Exonic Regions	Reads Mapped Confidently to Transcriptome	Reads Mapped Antisense to Gene	Fraction Reads in Cells	Total Genes Detected	Median UMI Counts per Cell	10x chromium kit version
Patient 1	P1T	1	tumor	4016	46602	1614	187157433	0.969	0.706	0.976	0.886	0.966	0.912	0.889	0.067	0.258	0.563	0.527	0.012	0.899	21045	4807	v2
Patient 1	P1N	2	normal	5182	31916	1112	165388918	0.976	0.674	0.976	0.854	0.972	0.952	0.932	0.054	0.233	0.645	0.609	0.008	0.94	21243	2580	v2
Patient 2	P2T	3	tumor	751	226809	834	170333815	0.967	0.966	0.965	0.865	0.965	0.952	0.919	0.118	0.26	0.541	0.509	0.011	0.856	15777	1988	v2
Patient 2	P2N	4	normal	425	542133	858	230406673	0.97	0.984	0.965	0.856	0.965	0.949	0.925	0.05	0.237	0.638	0.602	0.011	0.818	15016	1891	v2
Patient 3	P3T	5	tumor	2694	78286	1147	210903101	0.957	0.873	0.972	0.885	0.975	0.964	0.942	0.056	0.271	0.615	0.582	0.009	0.857	19506	3031	v2
Patient 3	P3N	6	normal	3275	71876	933	235395021	0.97	0.886	0.972	0.88	0.975	0.965	0.946	0.034	0.29	0.622	0.585	0.011	0.856	17690	2381	v2
Patient 4	P4T	7	tumor	1817	82099	1030	149174302	0.955	0.884	0.976	0.86	0.978	0.959	0.932	0.065	0.355	0.512	0.473	0.017	0.799	18086	2488	v2
Patient 4	P4N	8	normal	5245	30719	1008	161122810	0.955	0.742	0.971	0.87	0.978	0.963	0.925	0.045	0.361	0.52	0.482	0.015	0.85	20367	2351	v2
Patient 5	P5T1	9	tumor	2089	79114	1180	165271052	0.968	0.858	0.976	0.867	0.978	0.957	0.937	0.046	0.251	0.641	0.604	0.01	0.935	19666	2913	v2
Patient 5	P5T2	10	tumor	2658	55851	993	148454159	0.967	0.838	0.972	0.853	0.977	0.96	0.942	0.043	0.219	0.68	0.648	0.008	0.89	19351	5360	v2
Patient 5	P5N	11	normal	4337	32359	738	140341611	0.965	0.849	0.971	0.869	0.978	0.966	0.935	0.039	0.276	0.62	0.585	0.01	0.848	18211	1761	v2
Patient 6	P6T1	12	tumor	2920	50347	812	147015809	0.959	0.872	0.974	0.87	0.972	0.965	0.939	0.063	0.282	0.595	0.561	0.011	0.813	18645	2216	v2
Patient 6	P6T2	13	tumor	6719	21848	769	146799375	0.961	0.603	0.975	0.858	0.978	0.959	0.937	0.051	0.321	0.565	0.531	0.01	0.719	20162	4014	v2
Patient 6	P6T3	14	tumor	316	452174	341	142887052	0.968	0.987	0.973	0.859	0.978	0.962	0.919	0.099	0.203	0.617	0.584	0.01	0.688	12810	885	v2
Patient 6	P6N	15	normal	3796	43398	696	164740921	0.96	0.835	0.973	0.859	0.978	0.958	0.935	0.044	0.302	0.59	0.552	0.012	0.666	19593	2200	v2
Patient 7	P7T1	16	tumor	3733	62231	948	232310437	0.976	0.83	0.947	0.868	0.943	0.919	0.897	0.077	0.271	0.549	0.511	0.015	0.634	20148	3432	v2
Patient 7	P7T2	17	tumor	2867	54848	703	157249350	0.975	0.891	0.948	0.866	0.943	0.919	0.896	0.078	0.265	0.554	0.516	0.015	0.773	18427	1830	v2
Patient 7	P7N	18	normal	6730	25229	715	169791893	0.977	0.767	0.948	0.865	0.944	0.917	0.9	0.037	0.221	0.642	0.602	0.012	0.777	19957	2935	v2
Patient 8	P8T1	19	tumor	6043	22814	802	137865143	0.979	0.66	0.945	0.869	0.943	0.912	0.88	0.117	0.215	0.548	0.516	0.01	0.743	19954	4272	v2
Patient 8	P8T2	20	tumor	4840	25831	846	125024637	0.979	0.704	0.946	0.883	0.943	0.925	0.903	0.06	0.194	0.649	0.613	0.011	0.852	20249	5511	v2
Patient 8	P8N	21	normal	4839	29466	777	142588467	0.977	0.718	0.941	0.849	0.935	0.919	0.902	0.042	0.252	0.608	0.571	0.013	0.646	19767	2817	v2
Patient9	P9T	22	tumor	315	279673	245	88097228	0.98	0.977	0.962	0.813	0.963	0.915	0.89	0.082	0.16	0.647	0.61	0.014	0.685	13243	482	v2
Patient 9	P9N	23	normal	8044	18984	659	152709293	0.979	0.66	0.96	0.798	0.961	0.919	0.901	0.042	0.261	0.597	0.558	0.015	0.828	21137	5056	v2
Patient 10	P10T1	24	tumor	7382	19302	724	142490543	0.981	0.723	0.962	0.799	0.963	0.916	0.899	0.049	0.18	0.669	0.631	0.014	0.862	19921	3717	v2
Patient 10	P10T2	25	tumor	2893	53060	595	153504919	0.98	0.897	0.962	0.802	0.963	0.916	0.9	0.045	0.191	0.664	0.626	0.014	0.858	18784	3376	v2
Patient 10	P10N	26	normal	7648	20310	540	155331147	0.977	0.789	0.967	0.869	0.957	0.944	0.92	0.053	0.26	0.606	0.566	0.015	0.686	19505	1938	v2
Patient 11	P11T	27	tumor	1139	161102	1813	183495312	0.971	0.886	0.964	0.904	0.93	0.962	0.918	0.892	0.075	0.188	0.629	0.011	0.932	18760	5858	v2
Patient 11	P11N	28	normal	2291	68155	1275	156144512	0.973	0.853	0.963	0.909	0.932	0.961	0.92	0.903	0.085	0.197	0.621	0.011	0.903	19666	3926	v2
Patient12	P12T	29	tumor	2339	72658	861	169948588	0.978	0.887	0.963	0.9	0.91	0.962	0.905	0.871	0.084	0.197	0.589	0.01	0.876	18410	2106	v2
Patient 12	P12N	30	normal	2932	54842	724	160798561	0.978	0.905	0.964	0.902	0.951	0.963	0.91	0.892	0.068	0.227	0.597	0.012	0.91	18247	1611	v2
Patient 13	P13T	31	tumor	2223	107221	1122	238352627	0.98	0.862	0.964	0.91	0.942	0.962	0.908	0.885	0.042	0.238	0.605	0.01	0.861	19298	3361	v2
Patient 13	P13N	32	normal	2106	84551	1011	178065751	0.978	0.868	0.963	0.911	0.922	0.962	0.922	0.902	0.048	0.288	0.565	0.011	0.886	18714	2475	v2
Patient 14	P14T	33	tumor	1857	63362	805	117663612	0.909	0.825	0.928	0.841	0.875	0.929	0.897	0.878	0.032	0.205	0.641	0.027	0.83	18139	2085	v2
Patient 14	P14N	34	normal	3051	48721	508	148649698	0.908	0.92	0.928	0.848	0.897	0.929	0.9	0.878	0.047	0.273	0.557	0.028	0.817	18072	1065	v2
Patient 15	P15T	35	tumor	1363	159579	1073	217506413	0.981	0.91	0.927	0.845	0.895	0.928	0.915	0.894	0.056	0.141	0.698	0.006	0.8	18579	3135	v2
Patient 15	P15N	36	normal	4353	33804	1020	147150465	0.98	0.789	0.927	0.854	0.889	0.927	0.931	0.914	0.039	0.122	0.752	0.01	0.92	19815	3365	v2
Patient 16	P16T	37	tumor	2664	50624	1121	134864051	0.98	0.8	0.963	0.912	0.962	0.921	0.904	0.045	0.237	0.622	0.586	0.011	0.913	18672	2636	v2
Patient17	P17T	38	tumor	2576	67188	1722	173076844	0.98	0.728	0.963	0.916	0.962	0.942	0.924	0.049	0.205	0.67	0.632	0.009	0.912	20753	6329	v2
Patient 18	P18T	40	tumor	5889	32919	1702	193861327	0.98	0.6	0.962	0.912	0.96	0.933	0.918	0.041	0.188	0.689	0.654	0.008	0.91	21198	5140	v2
Patient 19	P19T	41	tumor	454	271455	363	123240904	0.976	0.928	0.963	0.9	0.962	0.916	0.896	0.055	0.265	0.576	0.541	0.01	0.878	14674	646	v2
Patient 20	P20T	42	tumor	2823	74893	1950	211423167	0.979	0.705	0.963	0.918	0.962	0.945	0.926	0.04	0.234	0.652	0.613	0.009	0.9	20578	6846	v2
Patient 21	P21T	43	tumor	475	316479	1927	150327685	0.978	0.91	0.963	0.903	0.961	0.923	0.907	0.044	0.205	0.657	0.62	0.01	0.903	18458	5757	v2
Patient 22	P22T	44	tumor	447	298199	824	133295354	0.978	0.945	0.964	0.909	0.962	0.934	0.911	0.053	0.266	0.592	0.557	0.012	0.908	14861	1984	v2
Patient 23	P23T1	45	tumor	15063	13519	1047	203646853	0.979	0.313	0.968	0.9	0.964	0.93	0.904	0.082	0.295	0.527	0.495	0.01	0.853	22719	2084	v3
Patient 23	P23T2	46	tumor	13848	13650	886	189038413	0.978	0.303	0.968	0.915	0.964	0.938	0.915	0.073	0.286	0.557	0.521	0.012	0.849	21915	1944	v3
Patient 23	P23N	47	normal	17928	11441	979	205128897	0.978	0.306	0.968	0.913	0.964	0.945	0.924	0.079	0.261	0.583	0.546	0.012	0.898	22074	2207	v3
Patient 24	P24T1	48	tumor	13477	16888	913	227605004	0.975	0.398	0.966	0.896	0.963	0.926	0.894	0.092	0.345	0.457	0.422	0.012	0.812	23119	1942	v3
Patient 24	P24T2	49	tumor	14796	11913	734	176266158	0.976	0.338	0.968	0.908	0.965	0.937	0.913	0.075	0.345	0.493	0.455	0.016	0.839	22247	1588	v3
Patient 24	P24N	50	normal	21466	8433	646	181041362	0.974	0.331	0.967	0.907	0.964	0.931	0.906	0.073	0.386	0.448	0.407	0.018	0.759	22636	1247	v3
Patient 25	P25T1	51	tumor	11917	20812	1012	248024503	0.983	0.419	0.958	0.902	0.955	0.943	0.92	0.063	0.317	0.539	0.503	0.012	0.892	22750	2239	v3
Patient 25	P25T2	52	tumor	10665	23158	1213	246988831	0.98	0.495	0.959	0.904	0.956	0.94	0.912	0.062	0.33	0.521	0.48	0.015	0.844	22431	2779	v3
Patient 25	P25N	53	normal	8763	29977	1351	262694735	0.981	0.538	0.96	0.904	0.956	0.93	0.905	0.072	0.331	0.502	0.463	0.014	0.787	22485	3132	v3
