# Supplementary material for: Deciphering cell lineage specification of human lung adenocarcinoma with single-cell RNA sequencing
Source: Research Square preprint supplement (doi:10.21203/rs.3.rs-127270/v1), 2021-01-07
Supplement: Supplementary file 3 [file f4f51ff385bb28f18debe8ac.xlsx]

## Sheet: Sheet1
	Patient ID	Sample Barcode	Sample type	Gender	Age at diagnosis(Years)	Smoking Status	Family History of Malignant Tumor	Personal History of Malignant Tumor	Affected lobe	Histological Subtype	Predominant Histological Subtype	Maximum Diameter of Tumor(cm)	Lymph node Metastasis	Stage	Kit
1	Patient 1	P1T	Tumor	F	55	N	N	N	Right middle	IA	Papillary	1.5cm	N	IA2	V2
2	Patient 1	P1N	Normal	/	/	/	/	/	/	/		/	/	/	V2
3	Patient 2	P2T	Tumor	F	46	N	Mother lung cancer	N	Left upper	MIA	/	0.7cm	N	IA1	V2
4	Patient 2	P2N	Normal	/	/	/	/	/	/	/		/	/	/	V2
5	Patient 3	P3T	Tumor	M	60	40yx30	N	N	Right lower	IA	Acinar	3.2cm	Y	IIIA	V2
6	Patient 3	P3N	Normal	/	/	/	/	/	/	/		/	/	/	V2
7	Patient 4	P4T	Tumor	M	60	15yx10	N	N	Left upper	MIA	/	1.5cm	N	IA1	V2
8	Patient 4	P4N	Normal	/	/	/	/	/	/	/		/	/	/	V2
9	Patient 5	P5T1	Tumor	F	44	N	N	N	Right lower 1	AAH	/	0.4cm	N	0	V2
10	Patient 5	P5T2	Tumor	/	/	/	/	/	Right lower 2	MIA	/	1.2cm	N	IA1	V2
11	Patient 5	P5N	Normal	/	/	/	/	/	/	/		/	/	/	V2
12	Patient 6	P6T1	Tumor	F	45	N	N	N	Left lower	MIA	/	1cm	N	IA1	V2
13	Patient 6	P6T2	Tumor	/	/	/	/	/	Left upper 1	IA	Acinar	1.5cm	N	IA2	V2
14	Patient 6	P6T3	Tumor	/	/	/	/	/	Left upper2	AAH	/	0.4cm	N	0	V2
15	Patient 6	P6N	Normal	/	/	/	/	/	/	/		/	/	/	V2
16	Patient 7	P7T1	Tumor	F	39	15yx2	Father gastric cancer	N	Right upper 1	AIS	/	0.5cm	N	IA1	V2
17	Patient 7	P7T2	Tumor	/	/	/	/	/	Right upper 2	MIA	/	0.7cm	N	IA1	V2
18	Patient 7	P7N	Normal	/	/	/	/	/	/	/		/	/	/	V2
19	Patient 8	P8T1	Numor	F	58	N	Father rectal cancer	N	Left upper 1	IA	Lepidic	1.2cm	N	IA2	V2
20	Patient 8	P8T2	Tumor	/	/	/	/	/	Left upper 2	AIS	/	0.8cm	N	IA1	V2
21	Patient 8	P8N	Normal	/	/	/	/	/	/	/		/	/	/	V2
22	Patient9	P9T	Tumor	F	55	N	Sister cholangiocarcinoma	N	Right upper	AIS	/	0.8cm	N	IA1	V2
23	Patient 9	P9N	Normal	/	/	/	/	/	/	/		/	/	/	V2
24	Patient 10	P10T1	Tumor	F	49	N	Father gastric cancer	N	Left upper 1	AIS	/	0.9cm	N	IA1	V2
25	Patient 10	P10T2	Tumor	/	/	/	/	/	Left upper 2	AAH	/	0.4cm	N	0	V2
26	Patient 10	P10N	Normal	/	/	/	/	/	/	/	/	/	/	/	V2
27	Patient 11	P11T	Tumor	M	74	Y	N	N	Right upper	IA	Solid	4.3cm	Y	IIIa	V2
28	Patient 11	P11N	Normal	/	/	/	/	/	/	/	/	/	/	/	V2
29	Patient12	P12T	Tumor	F	48	N	N	N	Right upper	IA	Solid	4.1cm	Y	IIIa	V2
30	Patient 12	P12N	Normal	/	/	/	/	/	/	/	/	/	/	/	V2
31	Patient 13	P13T	Tumor	F	78		N	N	Left lower	IA	Acinar	3.1cm	N	IIA	V2
32	Patient 13	P13N	Normal	/	/	/	/	/	/	/	/	/	/	/	V2
33	Patient 14	P14T	Tumor	F	68	40yx20	N	N	Left lower	IA	Solid	6.6cm	Y	IIIB	V2
34	Patient 14	P14N	Normal	/	/	/	/	/	/	/	/	/	/	/	V2
35	Patient 15	P15T	Tumor	F	58	30yx10	N	N	Right upper	IA	Na	3cm	Y	IIIA	V2
36	Patient 15	P15N	Normal	/	/	/	/	/	/	/	/	/	/	/	V2
37	Patient16	P16T	Tumor	F	60	N	N	N	Left lower	IA	Papillary+Acinar+Solid	2.4cm	N	IVA	V2
38	Patient 17	P17T	Tumor	F	38	N	N	N	Left upper	IA	Papillary+Acinar+Lepidic	2.7cm	N	IB	V2
39	Patient18	P18T	Tumor	M	61	20yX20	N	N	Right upper	IA	Lepidic	2.0cm	N	IB	V2
40	Patient19	P19T	Tumor	F	54	N	N	N	Left upper	IA	Papillary	0.7cm	N	IA1	V2
41	Patient20	P20T	Tumor	M	60	30y×20	N	N	Left lower	IA	Papillary	1.4cm	N	IA2	V2
42	Patient21	P21T	Tumor	F	64	N	N	N	Right upper	IA	Papillary	2.1cm	N	IB	V2
43	Patient 22	P22T	Tumor	F	53	N	N	N	Right middle	MIA	/	1.0cm	N	IA1	V2
44	Patient 23	P23T1	Tumor	M	62	40yX20	N	N	Right upper	MIA	/	2.8cm	N	IA2	V3
45	Patient 23	P23T2	Tumor	M	/	/	/	/	Right lower	MIA	/	1.3cm	N	IA2	V3
46	Patient 23	P23N	Normal	/	/	/	/	/	/	/	/	/	/	/	V3
47	Patient 24	P24T1	Tumor	M	59	N	N	N	Right upper	IA	Papillary+Acina	2.0cm	N	IIA	V3
48	Patient 24	P24T2	Tumor	/	/	/	/	/	Right upper	IA	Papillary	1.5cm	N	IIA	V3
49	Patient 24	P24N	Normal	/	/	/	/	/	/	/	/	/	/	/	V3
50	Patient 25	P25T1	Tumor	F	48	N	N	N	Right upper	AIS	/	0.5cm	N	IA1	V3
51	Patient 25	P25T2	Tumor	/	/	/	/	/	Right upper	MIA	/	0.7cm	N	IA1	V3
52	Patient 25	P25N	Normal	/	/	/	/	/	/	/	/	/	/	/	V3
